# Supplementary material
Source: publisher site journal article supplement (https://www.dovepress.com/article/231941)

Supplementary table 1. Primer sequences for real-time PCR.

| Gene name | Primer sequence |
| --- | --- |
| PPIA | F: 5，-GTGGTATAAAAGGGGCGGGAG- 3， |
| R: 5，-GTGGGGTTGACCATGGCTAATAGTA- 3， |
| B2M | F: 5，-ATGCCTGCCGTGTGAACCATGTGA- 3， |
| R: 5，-TCCAAATGCGGCATCTTCAAACCTC- 3， |
| CDC6 | F: 5，- TGTTCTCCTCGTGTAAAAGCC- 3， |
| R: 5，- GGGGAGTGTTGCATAGGTTGT- 3， |
| CDC45 | F: 5，- CTTGAAGTTCCCGCCTATGAAG- 3， |
| R: 5，- GCATGGTTTGCTCCACTATCTC- 3， |
| ORC6 | F: 5，- ACAAGGAGACATATCAGAGCTGT- 3，  R: 5，- AGTGGCCTGGATAAGTCAAGAT- 3， |
| SNHG7 | F: 5，- GTGGGGTGTTGGCATTCTTGTT- 3， |
|  | R: 5，- TGGTCAGCCTGGTCACTCTGG- 3， |

Supplementary figure 1. Kaplan-Meier survival curves by different levels of ORC6 expression in TCGA


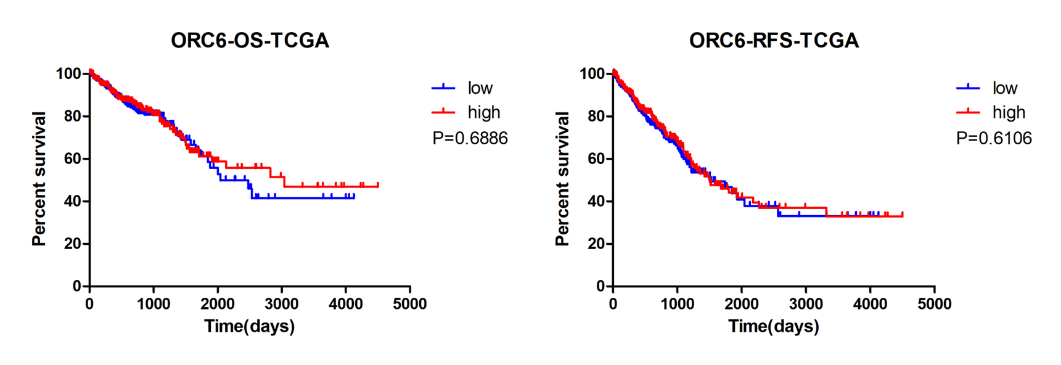

Supplement: Supplementary file 1 [file get_supplementary_file.php]
